# Supplementary material for: Identification and Characterization of msf, a Novel Virulence Factor in Haemophilus influenzae
Source: PLoS One. 2016 Mar 15;11(3):e0149891. doi: 10.1371/journal.pone.0149891 (PMC4792463; doi:10.1371/journal.pone.0149891)
Supplement: S1 Table — (XLSX) [file pone.0149891.s004.xlsx]

## Sheet: Sheet2
Strain	SGH Clustering Gene ID	ORF Size (aa)	SLR Locus	SLR Subtype
3655	CGSHi3655_1168	180	core	SlrC
3655	CGSHi3655_1047	216	4	SlrVH
3655	CGSHi3655_1046	121	4	SlrVI
22121	CGSHi22121_629	180	core	SlrC
22121	CGSHi22121_1987	219	1	SlrVA
22121	CGSHi22121_1989	148	1	SlrVA
22124	CGSHi22124_590	180	core	SlrC
22124	CGSHi22124_720	148	1	SlrVA
22124	CGSHi22124_722	219	1	SlrVA
22421	CGSHi22421_1419	180	core	SlrC
6P18H1	CGSHi6P18H1_153	180	core	SlrC
7P49H1	CGSHi7P49H1_1075	180	core	SlrC
7P49H1	CGSHi7P49H1_35-1	400	1	SlrVA
7P49H1	CGSHi7P49H1_37	254	1	SlrVB
7P49H1	CGSHi7P49H1_38	350	1	SlrVD
86028NP	RefHi86028NP_1330	180	core	SlrC
86028NP	RefHi86028NP_1471	148	1	SlrVA
86028NP	RefHi86028NP_1473	219	1	SlrVA
86028NP	RefHi86028NP_1475	184	1	SlrVA
86028NP	RefHi86028NP_1477	183	1	SlrVA
B10810	RefHiB10810_1887	180	core	SlrC
NML20	CGSHiNML20_1436	180	core	SlrC
NML20	CGSHiNML20_863	400	1	SlrVA
NML20	CGSHiNML20_865	254	1	SlrVB
NML20	CGSHiNML20_866	350	1	SlrVD
PittAA	CGSHiAA_1478	180	core	SlrC
PittBB	CGSHiBB_700	180	core	SlrC
PittBB	CGSHiBB_563	254	1	SlrVA
PittBB	CGSHiBB_565	327	1	SlrVA
PittBB	CGSHiBB_562	342	1	SlrVC
PittCC	CGSHiCC_1034	180	core	SlrC
PittCC	CGSHiCC_978	435	1	SlrVA
PittCC	CGSHiCC_977	341	1	SlrVC
PittDD	CGSHiDD_2024	181	core	SlrC
PittDD	CGSHiDD_2645	183	1	SlrVA
PittDD	CGSHiDD_2648	148	1	SlrVA
PittEE	CGSHiEE_1177	180	core	SlrC
PittEE	CGSHiEE_1102	400	1	SlrVA
PittEE	CGSHiEE_1100	254	1	SlrVB
PittEE	CGSHiEE_1099	350	1	SlrVD
PittGG	CGSHiGG_2048	180	core	SlrC
PittGG	CGSHiGG_28	398	1	SlrVA
PittGG	CGSHiGG_30	254	1	SlrVB
PittGG	CGSHiGG_31	340	1	SlrVC
PittGG	CGSHiGG_411	247	2	SlrVE
PittGG	CGSHiGG_410	166	2	SlrVF
PittHH	CGSHiHH_50	180	core	SlrC
PittHH	CGSHiHH_1102	255	1	SlrVA
PittHH	CGSHiHH_1104	184	1	SlrVA
PittHH	CGSHiHH_1106	254	1	SlrVA
PittHH	CGSHiHH_1107	343	1	SlrVC
PittII	CGSHiII_1639	180	core	SlrC
PittII	CGSHiII_19	148	1	SlrVA
PittII	CGSHiII_19-2	148	1	SlrVA
PittII	CGSHiII_21	219	1	SlrVA
PittII	CGSHiII_21-2	219	1	SlrVA
PittJJ	CGSHiJJ_252	180	core	SlrC
PittJJ	CGSHiJJ_13	135	1	SlrVA
PittJJ	CGSHiJJ_1896	148	1	SlrVA
R1838	CGSHiR1838_1750	180	core	SlrC
R1838	CGSHiR1838_233	218	1	SlrVA
R1838	CGSHiR1838_235	327	1	SlrVA
R1838	CGSHiR1838_237	254	1	SlrVB
R1838	CGSHiR1838_238	341	1	SlrVC
R1838	CGSHiR1838_588	105	3	SlrVG
R2846	RefHiR2846_503	180	core	SlrC
R2846	RefHiR2846_436	364	1	SlrVA
R2846	RefHiR2846_434	254	1	SlrVB
R2846	RefHiR2846_433	350	1	SlrVD
R2866	RefHiR2866_755	180	core	SlrC
R2866	RefHiR2866_819	148	1	SlrVA
R2866	RefHiR2866_821	219	1	SlrVA
R2866	RefHiR2866_823	148	1	SlrVA
R2866	RefHiR2866_825	219	1	SlrVA
R3021	CGSHiR3021_61	180	core	SlrC
R393	CGSHiR393_1086	180	core	SlrC
R393	CGSHiR393_1668	148	1	SlrVA
R393	CGSHiR393_1773	183	1	SlrVA
RdKW20	RefHiRdKW20_1748	180	core	SlrC
