# Supplementary material for: Identification and Characterization of msf, a Novel Virulence Factor in Haemophilus influenzae
Source: PLoS One. 2016 Mar 15;11(3):e0149891. doi: 10.1371/journal.pone.0149891 (PMC4792463; doi:10.1371/journal.pone.0149891)
Supplement: S2 Table — Each consensus motif was defined by the most prevalent amino acid found at each position in the motif. n = number of sequences used to generate each motif. (XLSX) [file pone.0149891.s005.xlsx]

## Sheet: Sheet1
Slr Protein Subfamily	Consensus motif	n	Corresponding Figure
All H. influenzae SLR-containing proteins	YFEAVKWYRKAAEQGDADAQFNLGVMYLLGRGVKQD	256	Figure 1A
SlrC	WEKAFWIFSEAAEEGNVKALNNLGMLYLLGDGTKQD	48	Figure 1B
All SlrV	YFEAVKWYRKAAEQGYADAQFNLGVMYANGRGVKQD	208	Figure 1C
SlrVA	DFEAVKWYRKAAEQGYADAQFNLGVMYAKGRGVKQD	152	S1 Fig
SlrVB	YTEAIKWLKKAAEQGDGIAQAILGDMYKDGDGVKQN	30	S1 Fig
SlrVC	EKSPAELLRQLAEKGYPAAQAQLAQAYFSGDGVEFA	10	S1 Fig
SlrVD	EDFSPARLRVLAEKGNAVTQYQLGRYYFIKGQKNLA	4	S1 Fig
SlrVE	DKEALNELIKLAQQGNMNAQYNLGLKYYKGEGVKQA	3	S1 Fig
SlrVF	ANQSIKWFTAAAEQGIAEAQAMLAAAYEKGDCVIQK	3	S1 Fig
SlrVG	YQTALKLLQPLAAQGHAKAQFNLGTMYHNGEGVKRD	1	S1 Fig
SlrVH	YAEAAKWYRKAAEQGDAFAQLFLGEMYANGKGVEQD	4	S1 Fig
SlrVI	YAQSFELFTKASEKNCANADFYLAAQYYNGQHLSKN	1	S1 Fig
