# Supplementary material for: Identification and Characterization of msf, a Novel Virulence Factor in Haemophilus influenzae
Source: PLoS One. 2016 Mar 15;11(3):e0149891. doi: 10.1371/journal.pone.0149891 (PMC4792463; doi:10.1371/journal.pone.0149891)
Supplement: S3 Table — Columns B-K are gene possession data from the supragenome hybridization array; "1" presence and "0" absence of each listed gene. Columns L-M are data from PCR analysis of each strain. # based on PCR using primers to genes upstream and downstream of slrC. * based on PCR with primers to the putative transporting ATPase and prfA; size in the absence of slrV genes is ~1300 bp. (XLSX) [file pone.0149891.s006.xlsx]

## Sheet: Sheet1
Strain	slrC	slrVA	slrVB	slrVC	slrVD	slrVE	slrVF	slrVG	slrVH	slrVI	PCR for cHiSLR#	Approximate size of SlrV locus 1 (bp)*	Phenotype	Source
1479	1	1	0	0	1	0	0	1	0	0	Y	4000	Commensal	Upper Respiratory Tract
2019	1	0	0	0	0	0	0	0	0	0	Y	1400	Commensal	Upper Respiratory Tract
2222.2	1	0	0	0	0	0	0	0	0	0	Y	1300	Commensal	Nasopharynx
2626	1	1	0	0	0	0	0	0	0	0	Y	4000	Commensal	Upper Respiratory Tract
3198	1	1	1	0	1	0	0	0	0	0	Y	5000	Commensal	Upper Respiratory Tract
3655	1	0	0	0	0	0	0	0	1	1	NO DATA	NO DATA	Virulent	Invasive, blood
5987	1	1	0	0	0	0	0	0	0	0	Y	3500	Commensal	Upper Respiratory Tract
7502	1	0	0	0	1	0	0	0	0	0	Y	4100	Commensal	Upper Respiratory Tract
22121	1	1	0	0	0	0	0	0	0	0	Y	3000	Commensal	Nasopharynx
22122	1	1	0	0	0	0	0	0	0	0	Y	2800	Commensal	Nasopharynx
22124	1	1	0	0	0	0	0	0	0	0	Y	2800	Commensal	Nasopharynx
22221	1	1	0	0	0	0	0	0	0	0	Y	3500	Commensal	Nasopharynx
22421	1	0	0	0	0	0	0	0	0	0	Y	1400	Commensal	Nasopharynx
22422	1	1	1	0	1	0	0	0	0	0	Y	3500	Commensal	Nasopharynx
22424	1	1	1	0	1	0	0	0	0	0	Y	3500	Commensal	Nasopharynx
22426	1	1	1	0	1	0	0	0	0	0	Y	3500	Commensal	Nasopharynx
26121	1	0	0	0	0	0	0	0	0	0	Y	1300	Commensal	Nasopharynx
26122	1	0	0	0	0	0	0	0	0	0	Y	1300	Commensal	Nasopharynx
26123	1	1	0	0	0	0	0	0	0	0	Y	2800	Commensal	Nasopharynx
26221	1	0	0	0	0	0	0	0	0	0	Y	1300	Commensal	Nasopharynx
26222	1	1	0	0	0	0	0	0	1	1	Y	1300	Commensal	Nasopharynx
26222.2	1	1	0	0	0	0	0	0	1	1	Y	1300	Commensal	Nasopharynx
26223	1	1	0	0	0	0	0	0	1	1	Y	1300	Commensal	Nasopharynx
26224	1	0	0	0	0	0	0	0	1	1	Y	1300	Commensal	Nasopharynx
26225	1	1	0	0	0	0	0	0	0	0	Y	4100	Commensal	Nasopharynx
26226	1	0	0	0	0	0	0	0	1	1	Y	1300	Commensal	Nasopharynx
26227	1	0	0	0	0	0	0	0	1	1	Y	1300	Commensal	Nasopharynx
26228	1	0	0	0	0	0	0	0	1	1	Y	1300	Commensal	Nasopharynx
26322	1	1	0	0	1	0	0	0	0	0	Y	3000	Commensal	Nasopharynx
26323	1	1	0	0	1	0	0	0	1	1	Y	4100	Commensal	Nasopharynx
26324	1	0	0	0	0	0	0	0	1	1	Y	1300	Commensal	Nasopharynx
26326	1	1	0	0	1	0	0	0	0	0	Y	2800	Commensal	Nasopharynx
26327	1	1	0	0	1	0	0	0	1	1	Y	4100	Commensal	Nasopharynx
26328	1	0	0	0	0	0	0	0	1	1	Y	1300	Commensal	Nasopharynx
26421	1	0	0	0	0	0	0	0	1	1	Y	1300	Commensal	Nasopharynx
26422	1	1	0	0	0	0	0	0	1	1	Y	1300	Commensal	Nasopharynx
26423	1	0	0	0	0	0	0	0	1	1	Y	1300	Commensal	Nasopharynx
26424	1	0	0	0	0	0	0	0	1	1	Y	1300	Commensal	Nasopharynx
26426	1	1	0	0	1	0	0	0	0	0	Y	2800	Commensal	Nasopharynx
26427	1	1	0	0	1	0	0	0	0	0	Y	2800	Commensal	Nasopharynx
26428	1	1	0	0	1	0	0	0	0	0	Y	2800	Commensal	Nasopharynx
26429	1	0	0	0	0	0	0	0	1	1	Y	1300	Commensal	Nasopharynx
264210	1	1	0	0	1	0	0	0	0	0	Y	2800	Commensal	Nasopharynx
12P56H1	1	1	0	0	0	0	0	0	0	0	Y	3500	Virulent	COPD, Exacerbation strain
13P24H1	1	0	0	0	1	0	0	0	0	0	Y	1700	Virulent	COPD, Exacerbation strain
14P33H1	1	1	0	0	0	0	0	0	0	0	Y	4200	Virulent	COPD, Exacerbation strain
24P17H1	1	1	0	0	0	0	0	0	0	0	Y	4100	Virulent	COPD, Exacerbation strain
24P44H1	1	1	1	0	1	0	0	0	0	0	Y	5200	Virulent	COPD, Exacerbation strain
31P14H1	1	1	1	0	1	0	0	0	0	0	Y	5200	Virulent	COPD, Colonization strain
31P7H1	1	1	1	0	1	0	0	0	0	0	Y	5200	Virulent	COPD
39P20H1	1	1	0	1	1	0	0	0	0	0	Y	6500	Virulent	COPD, Colonization strain
3P14H1	1	1	1	0	1	0	0	0	0	0	Y	5600	Virulent	COPD, Colonization strain
45P9H1	1	1	0	0	0	0	0	0	0	0	Y	3500	Virulent	COPD, Exacerbation strain
46P8H1	1	1	0	0	0	0	0	0	0	0	Y	3500	Virulent	COPD
48P28H1	1	1	0	0	0	0	0	0	0	0	Y	4100	Virulent	COPD, Exacerbation strain
49P5H1-2	1	1	1	0	1	0	0	0	0	0	Y	5200	Virulent	COPD, Colonization strain
50P5H1	1	1	0	0	0	0	0	0	0	0	Y	3500	Virulent	COPD, Colonization strain
51P5H1	0	1	0	0	1	0	0	0	0	1	Y	3500	Virulent	COPD
59P3H1	1	1	1	0	1	0	0	0	0	0	Y	5000	Virulent	COPD, Colonization strain
5P11H1	1	1	0	0	0	0	0	0	0	0	Y	4500	Virulent	COPD, Colonization strain
69P2H1	1	1	0	0	0	0	0	0	0	0	Y	3200	Virulent	COPD, Colonization strain
69P6H5	1	1	0	0	0	0	0	0	0	0	Y	3200	Virulent	COPD, Colonization strain
6P18H1	1	0	0	1	0	0	0	0	0	0	Y	NO DATA	Virulent	COPD
6P5H	1	1	0	0	1	0	0	0	0	0	Y	1650	Virulent	COPD, Exacerbation strain
6P8H1	1	1	1	0	1	0	0	0	0	0	Y	5200	Virulent	COPD
72P12H1	1	1	0	0	1	0	0	0	0	0	Y	3500	Virulent	COPD, Colonization strain
7P49H1	1	1	1	0	1	0	0	0	0	0	Y	5200	Virulent	COPD exacerbation strain
86028NP	1	1	0	0	0	0	0	0	0	0	NO DATA	NO DATA	Commensal	Nasopharynx
B10810	1	0	0	1	0	0	0	0	0	0	NO DATA	NO DATA	Virulent	Meningitis
C1344	1	1	0	0	0	0	0	0	0	0	Y	4500	Virulent	OME
C1626	1	1	0	0	0	0	0	0	0	0	Y	3500	Virulent	OME
C1806	1	1	0	0	0	0	0	0	0	0	NO DATA	NO DATA	Virulent	Invasive
C188	1	1	1	0	1	1	1	0	0	0	NO DATA	NO DATA	Virulent	Invasive
C2074	1	1	0	0	0	0	0	0	0	0	NO DATA	NO DATA	Virulent	Invasive
C2311	1	1	0	0	0	0	0	0	0	0	NO DATA	NO DATA	Virulent	Invasive
C2859	1	1	0	0	1	0	0	0	0	0	NO DATA	NO DATA	Virulent	Invasive
C2945	1	1	0	0	0	0	0	0	0	0	NO DATA	NO DATA	Virulent	Invasive
C2949	1	1	1	0	1	1	1	0	0	0	NO DATA	NO DATA	Virulent	Invasive
C2950	1	1	1	0	1	0	0	0	0	0	NO DATA	NO DATA	Virulent	Invasive
C2954	1	0	0	0	0	0	0	0	0	0	NO DATA	NO DATA	Virulent	Invasive
C2957	1	1	0	1	1	0	0	0	0	0	NO DATA	NO DATA	Virulent	Invasive
C486	1	1	1	0	1	0	0	0	0	0	Y	5200	Virulent	OME
C500	1	1	0	0	0	0	0	0	0	0	Y	3800	Commensal	Nasopharyngeal isolates
C505	1	0	0	0	0	0	0	0	0	0	Y	1400	Virulent	OME
CZ133	1	1	0	1	1	0	0	0	0	0	Y	5000	Commensal	nasopharynx, carriage, child
CZ139	1	1	0	0	0	0	0	0	0	0	Y	4100	Commensal	nasopharynx, carriage, child
CZ1808/04	1	0	0	0	1	0	0	0	0	0	Y	1500	Virulent	sputum isolate, pneumonia, adult
CZ183	1	1	0	0	0	0	0	0	0	0	Y	4000	Commensal	nasopharynx, carriage, child
CZ2051/04	1	0	0	0	0	0	0	1	0	0	Y	1300	Virulent	sputum isolate, pneumonia, adult
CZ222	1	0	0	0	1	0	0	0	0	0	Y	3800	Commensal	nasopharynx, carriage, child
CZ2449/04	1	1	0	0	0	0	0	0	0	0	Y	4000	Virulent	sputum isolate, pneumonia, adult
CZ26	1	0	0	0	1	0	0	0	0	0	Y	1650	Commensal	nasopharynx, carriage, child
CZ2650/04/1	1	0	0	0	1	0	0	0	0	0	Y	3800	Virulent	sputum isolate, pneumonia, adult
CZ2684/04	1	1	0	0	1	0	0	1	0	0	Y	5000	Virulent	blood isolate, bacteraemia, adult
CZ3165/04	1	0	0	0	1	0	0	0	0	0	Y	3800	Virulent	blood isolate, pneumonia, adult
CZ34	1	1	0	0	1	0	0	1	0	0	Y	5000	Commensal	nasopharynx, carriage, child
CZ363	1	1	0	0	1	0	0	0	0	0	Y	3500	Commensal	nasopharynx, carriage, child
CZ383	1	1	0	0	1	0	0	1	0	0	Y	5000	Commensal	nasopharynx, carriage, child
CZ4071/02	1	1	1	1	1	0	0	1	0	0	Y	4800	Virulent	otitis media, middle ear fluid, child
CZ4126/02	1	1	1	0	1	0	0	0	0	0	Y	5000	Virulent	otitis media, middle ear fluid, child
CZ416	1	1	1	0	1	0	0	1	0	0	Y	4500	Commensal	nasopharynx, carriage, child
CZ478/02	1	1	0	0	1	0	0	0	0	0	Y	4800	Virulent	otitis media, middle ear fluid, child
CZ525/04	1	1	0	0	1	0	0	1	0	0	Y	5000	Virulent	blood isolate, bacteraemia, adult
M69H	1	1	0	0	0	0	0	0	0	0	Y	3200	Virulent	meningitis, child
NML1	1	0	0	0	1	0	0	0	0	0	Y	3500	Virulent	Invasive
NML10	1	1	0	0	0	0	0	0	0	0	Y	3500	Virulent	Invasive
NML11	1	1	0	0	0	0	0	0	0	0	Y	3500	Virulent	Invasive
NML12	1	1	0	0	1	0	0	0	0	0	Y	1800	Virulent	Invasive
NML13	1	1	1	0	1	0	0	0	0	0	Y	5200	Virulent	Invasive
NML14	1	0	0	0	1	0	0	0	0	0	Y	1800	Virulent	Invasive
NML15	1	0	0	0	1	0	0	0	0	0	Y	4100	Virulent	Invasive
NML16	1	1	0	0	0	0	0	0	0	0	Y	3800	Virulent	Invasive
NML17	1	1	0	0	0	0	0	0	0	0	Y	4500	Virulent	Invasive
NML18	1	1	0	0	0	0	0	0	0	0	Y	4000	Virulent	Invasive
NML19	1	1	0	0	0	0	0	0	0	0	Y	3500	Virulent	Invasive
NML20	1	1	1	0	1	0	0	0	0	0	Y	5300	Virulent	Invasive
NML21	1	0	0	0	0	0	0	0	0	0	Y	1400	Virulent	Invasive
NML22	1	1	0	0	0	0	0	0	0	0	Y	4500	Virulent	Invasive
NML3	1	1	1	0	1	0	0	0	0	0	Y	2500	Virulent	Invasive
NML4	1	1	0	0	0	0	0	0	0	0	Y	3500	Virulent	Invasive
NML5	1	1	0	1	1	0	0	0	0	0	Y	6500	Virulent	Invasive
NML6	1	1	0	0	0	0	0	0	0	0	Y	4500	Virulent	Invasive
NML7	1	0	0	0	0	0	0	0	0	0	Y	1400	Virulent	Invasive
NML8	1	0	0	0	0	0	0	0	0	0	Y	1400	Virulent	Invasive
NML9	1	1	1	0	1	0	0	0	0	0	Y	5200	Virulent	Invasive
P02H	1	1	1	0	1	0	0	0	0	0	Y	3100	Virulent	pneumonia, child
P1030H	1	1	0	0	0	0	0	0	0	0	Y	3200	Commensal	healthy, child
P112H	1	1	1	0	1	0	0	0	0	0	Y	5200	Commensal	healthy, child
P1297H	1	0	0	0	1	0	0	0	0	0	Y	2800	Virulent	pneumonia, child
P187H	1	1	1	0	1	0	0	0	0	0	Y	5000	Virulent	pneumonia, child
P40H	1	1	0	0	0	0	0	0	0	0	Y	4100	Commensal	healthy, child
P415H	1	1	1	0	1	0	0	0	0	0	Y	5200	Virulent	pneumonia, child
P494H	1	0	0	0	0	0	0	0	1	1	Y	1300	Commensal	healthy, child
P532H	1	1	0	0	0	0	0	0	0	0	Y	3500	Commensal	healthy, child
P533H	1	1	1	0	1	0	0	0	0	0	Y	5000	Commensal	healthy, child
P540H	1	1	0	0	1	0	0	0	0	0	Y	4000	Commensal	healthy, child
P5ME2.1	1	1	0	1	1	0	0	0	0	0	Y	6500	Commensal	Nasopharynx
P685H	1	1	1	0	1	0	0	0	0	0	Y	5000	Virulent	pneumonia, child
P752H	1	1	1	0	1	0	0	0	0	0	Y	3100	Virulent	pneumonia, child
P783G	1	1	1	0	1	0	0	0	0	0	Y	5200	Virulent	pneumonia, child
PittAA	1	0	0	1	0	0	0	0	0	0	Y	1650	Virulent	COME, tube replacement, non-invasive
PittBB	1	1	1	1	0	0	0	0	0	0	Y	5200	Virulent	COME, tube replacement
PittCC	1	1	0	1	0	0	0	0	0	0	Y	3600	Virulent	COME, tube replacement
PittDD	1	1	0	0	0	0	0	0	0	0	Y	4200	Virulent	COME, tube replacement
PittEE	1	1	1	0	1	0	0	0	0	0	Y	5500	Virulent	COME, tube replacement
PittGG	1	1	1	1	0	1	1	0	0	0	Y	5200	Virulent	AOM, otorrhea, highly invasive
PittHH	1	1	1	1	0	0	0	0	0	0	Y	6500	Virulent	COME, tube replacement
PittII	1	1	0	0	0	0	0	0	0	0	Y	4200	Virulent	AOM, otorrhea, highly invasive
PittJJ	1	1	0	0	0	0	0	0	0	0	Y	4200	Virulent	COME, tube replacement
R1507	1	1	1	0	1	0	0	0	0	0	NO DATA	NO DATA	Virulent	Invasive
R1606	1	1	0	0	0	0	0	0	0	0	NO DATA	NO DATA	Virulent	Invasive
R1834	1	1	0	0	0	0	0	0	0	0	Y	4800	Virulent	Lung Aspirate, pneumonia, Papua New Guinea
R1836	1	0	0	0	0	0	0	0	0	0	Y	1400	Virulent	Lung Aspirate, Papua New Guinea
R1838	1	1	1	1	0	0	0	1	0	0	NO DATA	NO DATA	Virulent	Blood isolate, Papua New Guinea
R1902	1	1	0	0	0	0	0	0	0	0	NO DATA	NO DATA	Virulent	Invasive
R2040	1	0	0	0	0	0	0	1	0	0	NO DATA	NO DATA	Virulent	Invasive
R2041	1	0	0	0	0	0	0	1	0	0	NO DATA	NO DATA	Virulent	Invasive
R2653	1	1	0	0	0	0	0	0	0	0	NO DATA	NO DATA	Virulent	Invasive
R2846	1	1	1	0	1	0	0	0	0	0	Y	5000	Virulent	OME
R2866	1	1	0	0	0	0	0	0	0	0	Y	4000	Virulent	Blood isolate
R3019	1	1	0	0	0	0	0	0	0	0	Y	4500	Commensal	Nasopharyngeal isolates
R3021	1	0	0	1	0	0	0	0	0	0	Y	1700	Commensal	Nasopharynx
R3022	1	1	0	0	0	0	0	0	0	0	Y	3800	Commensal	Nasopharyngeal isolates
R3023	1	0	0	0	1	0	0	0	0	0	Y	1800	Commensal	Nasopharyngeal isolates
R3024	1	0	0	0	1	0	0	0	0	0	Y	1800	Commensal	Nasopharyngeal isolates
R3046	1	1	0	0	0	0	0	0	0	0	NO DATA	NO DATA	Virulent	Invasive
R3052	1	1	0	0	0	0	0	0	0	0	NO DATA	NO DATA	Virulent	Invasive
R3140	1	1	0	0	1	0	0	0	0	0	Y	Failed	Virulent	OME
R3157	1	0	0	0	1	0	0	0	0	0	Y	4000	Virulent	OME
R3174	1	0	0	0	1	0	0	0	0	0	NO DATA	NO DATA	Virulent	Invasive
R3176	1	1	0	0	0	0	0	0	0	0	NO DATA	NO DATA	Virulent	Invasive
R3261	1	1	0	0	1	0	0	0	0	0	Y	Failed	Commensal	Nasopharyngeal isolates
R3262	1	0	0	0	0	0	0	0	0	0	Y	1400	Commensal	Nasopharyngeal isolates
R3263	1	0	0	0	0	0	0	0	0	0	Y	1400	Commensal	Nasopharyngeal isolates
R3264	1	1	0	0	1	0	0	0	0	0	Y	2900	Commensal	Nasopharyngeal isolates
R3265	1	0	0	0	0	0	0	0	0	0	Y	1400	Commensal	Nasopharyngeal isolates
R3366	1	1	1	0	1	0	0	0	0	0	Y	5200	Commensal	Nasopharyngeal isolates
R3367	1	1	1	0	1	0	0	0	0	0	Y	5200	Commensal	Nasopharyngeal isolates
R3369	1	0	0	0	1	0	0	0	0	0	Y	4000	Commensal	Nasopharyngeal isolates
R3370	1	1	1	0	1	0	0	1	0	0	Y	5200	Commensal	Nasopharyngeal isolates
R3567	1	1	0	0	0	0	0	0	0	0	Y	3500	Virulent	Invasive
R3568	1	1	0	0	0	0	0	0	0	0	Y	4000	Virulent	Invasive
R3570	1	0	0	0	0	0	0	0	0	0	Y	1300	Virulent	Invasive
R3579	1	1	1	0	1	0	0	0	0	0	Y	5000	Virulent	Invasive
R3596	1	1	0	0	0	0	0	0	0	0	NO DATA	NO DATA	Virulent	Invasive
R3601	1	1	0	0	1	0	0	0	0	0	Y	5200	Virulent	Invasive
R3678	1	1	0	0	0	0	0	0	0	0	NO DATA	NO DATA	Virulent	Invasive
R3679	1	1	1	0	1	0	0	0	0	0	NO DATA	NO DATA	Virulent	Invasive
R3680	1	1	1	0	1	0	0	0	0	0	NO DATA	NO DATA	Virulent	Invasive
R3681	1	0	0	0	1	0	0	0	0	0	NO DATA	NO DATA	Virulent	Invasive
R3682	1	1	0	0	0	0	0	0	0	0	NO DATA	NO DATA	Virulent	Invasive
R3683	1	1	0	1	1	0	0	0	0	0	NO DATA	NO DATA	Virulent	Invasive
R3686	1	0	0	0	1	0	0	0	0	0	NO DATA	NO DATA	Virulent	Invasive
R3778	1	1	0	0	0	0	0	0	0	0	NO DATA	NO DATA	Virulent	Invasive
R393	1	1	0	0	0	0	0	0	0	0	Y	3100	Virulent	sputum isolate, pneumonia, adult, Malaysia
R488	1	1	0	0	0	0	0	0	0	0	NO DATA	NO DATA	Virulent	Invasive
R944	1	1	1	0	1	0	0	0	0	0	NO DATA	NO DATA	Virulent	Invasive
RdKW20	1	0	0	1	0	0	0	0	0	0	NO DATA	NO DATA	Commensal	Laboratory strain
UC10	1	1	0	0	1	0	0	0	1	1	Y	2500	Commensal	Throat swab, asymptomatic, biotype IV
UC11	1	1	0	1	1	0	0	0	0	0	Y	6500	Commensal	Throat swab, asymptomatic, biotype I
UC12	1	1	0	1	1	0	0	0	0	0	Y	6500	Commensal	Throat swab, asymptomatic, biotype II
UC13	1	0	0	0	0	0	0	0	0	0	Y	1300	Commensal	Throat swab, asymptomatic, biotype IV
UC15	1	1	0	0	0	0	0	0	0	0	Y	1300	Commensal	Throat swab, asymptomatic, biotype V
UC16	1	0	0	0	0	0	0	0	1	1	Y	1300	Commensal	Throat swab, asymptomatic, biotype II
UC17	1	0	0	0	1	0	0	0	0	0	Y	1650	Commensal	Throat swab, asymptomatic, biotype III
UC5	1	1	0	1	1	0	0	0	0	0	Y	6000	Commensal	Throat swab, asymptomatic, biotype II
UC6	1	1	0	1	1	0	0	0	0	0	Y	6500	Commensal	Throat swab, asymptomatic, biotype III
UC7	1	1	0	0	1	0	0	0	0	0	Y	5000	Commensal	Throat swab, asymptomatic, biotype III
UC8	1	1	0	0	0	0	0	0	0	0	Y	4100	Commensal	Throat swab, asymptomatic, biotype II
UC9	1	1	0	0	1	0	0	0	0	0	Y	5000	Commensal	Throat swab, asymptomatic, biotype III
# strains gene is present in:	209	153	45	21	98	3	3	12	20	21
Percentage of total strains	0.995238	0.728571	0.214286	0.1	0.466667	0.0142857	0.0142857	0.0571429	0.0952381	0.1
