# Supplementary material for: Identification and Characterization of msf, a Novel Virulence Factor in Haemophilus influenzae
Source: PLoS One. 2016 Mar 15;11(3):e0149891. doi: 10.1371/journal.pone.0149891 (PMC4792463; doi:10.1371/journal.pone.0149891)
Supplement: S4 Table — (XLSX) [file pone.0149891.s007.xlsx]

## Sheet: Sheet1
gene	predicted amino acid sequence	size
msfA1	MRFTKTLFTTALFGASVFSFQSTAWADTLEQQFQQGSEATTRGDYQTTFKFLLPLAEQGNALAQMMLGVMYAKGQGVKQDDVEAVKWYRKAAEQGYADAQAMLGFSYLLGQSGVQVNKSLAKEWFGKACDNGDQNGCEYYGKLNRGEL	148
msfA2	MKLTKTLLTTALFGASIFSFQSTAWADTPEQQFQQGLTAYEQSDYQTAFKLWLPMAEQGYAQAQGGLGMMYERGLGVKQDDFKAVNWYRKAAEQGDADAQLNLGAMYAIGHGVKQDGVEAVKWFRKAAEQGNAKAQNGLGMMYRGRLGIKQDYFKAVKWYRKAAEQGYGGAQVMLGFSYLSGKGVQVNKSLAKEWFGKACDNGEQVGCEYYSKLNRGER	219
msfA3	MKLTKTLLTTALLGASVFSFQSTAWADTPEQQFQQGSTAYEQSDYQTAFKLWLPMAEQGDANVQFNLGVMYAKGQGVKQDDFEAVKWFRKAAEQGHAKAQAILGFSYLLGERGVQVNKSLAKEWFGKACDNGNQDGCEYYGKLNRGGF	148
msfA4	MKLTKTLLTTALLGASVFSFQSTAWADTPEQQFQQGSTAYEQSDYQTAFKLWLPMAEQGDANVQFNLGVMYAKGQGVKQDDFEAVKWYRKAAEQGHAKAQFNLGVMYAKGQGVKQDDFKAVKWYRKAAEQGYADAQANLGSAYSAGRGVRQDYIEAVKWFKKAAENGSADGQFKLGLVYLIGQSIQKDRTLAKEWFGKACDNGEQRGCEYYGKLNRGEL	219
