# Supplementary material for: Identification and Characterization of msf, a Novel Virulence Factor in Haemophilus influenzae
Source: PLoS One. 2016 Mar 15;11(3):e0149891. doi: 10.1371/journal.pone.0149891 (PMC4792463; doi:10.1371/journal.pone.0149891)
Supplement: S5 Table — (XLSX) [file pone.0149891.s008.xlsx]

## Sheet: Sheet1
Otologic Score	Degree of Otoscopic Disease	Systemic Score	Degree of Systemic Disease
1	None/Mild	1	Normal or Slightly lethargic, upright and steady on feet. Immediately responds to stimulation by actively moving around cage. Eating and drinking normally
2	Moderate	2	Slightly lethargic, upright and steady on feet. Head and Ears down, eyes ½ open. Immediately responds to stimulation by actively moving around cage. Eating and drinking
3	Frank Purulence	3	Moderately lethargic, slightly ataxic. Able to keep self upright. May not be eating or drinking
4	Tympanic Membrane Rupture	4	Very lethargic and very ataxic. Not able to maintain an upright position. Very limited movement, Dyspnea. Considered moribund
