# Supplementary material for: Identification and Characterization of msf, a Novel Virulence Factor in Haemophilus influenzae
Source: PLoS One. 2016 Mar 15;11(3):e0149891. doi: 10.1371/journal.pone.0149891 (PMC4792463; doi:10.1371/journal.pone.0149891)
Supplement: S6 Table — Genes that passed all filters based on SAM q-values, SAM and Benjamini-Hochberg (BH) false discovery rates (FDR), p-values (Bon: Bonferroni-corrected) and raw expression cutoffs. WT-avg: Average expression value for PittII. KO-avg: Average expression value for PittII Msf-KO. Genes are sorted by the magnitude of fold changes. (XLSX) [file pone.0149891.s009.xlsx]

## Sheet: Sheet1
SGH-Array Cluster ID	WT-avg	KO-avg	FOLD	pVal	BH FDR	SAM q-value	SAM local FDR	Bon pVal	ANNOTATION
cluster1866	548.955	9555.6	17.4069	4.21885e-15	5.92859e-13	0	0.000529173	7.88503e-12	Chaperone protein HtpG
cluster478	1553.44	26794.8	17.2486	1.04361e-14	1.21907e-12	0	0.000633035	1.95051e-11	Candidate type III effector Hop protein
cluster1893	1810.59	27961.1	15.443	1.77636e-15	3.01819e-13	0	0	3.32001e-12	Hydroxypyruvate isomerase (EC 5.3.1.22)
cluster848	2222.7	32982.4	14.8389	1.43219e-14	1.57456e-12	0	0.000560611	2.67676e-11	Ribulose-5-phosphate 4-epimerase and related epimerases and aldolases
cluster2987	2008.23	25208.3	12.5525	1.26121e-13	9.8217e-12	0	0.000564004	2.35721e-10	Chaperone protein DnaK
cluster2494	2072.54	24769.1	11.9511	1.06581e-13	8.6609e-12	0	0.000662692	1.99201e-10	Chaperone protein DnaJ
cluster2981	3346.29	35106.9	10.4913	1.9984e-15	3.11251e-13	0	0.00064805	3.73501e-12	ClpB protein
cluster2413	4490.79	42354.2	9.43137	7.21645e-15	8.9917e-13	0	0.000708155	1.34875e-11	D-beta-hydroxybutyrate dehydrogenase (EC1.1.1.30)
cluster1667a	3291.05	29974.6	9.10791	1.53877e-13	1.15038e-11	0	0	2.87596e-10	Nucleoside-diphosphate-sugar epimerases
cluster2055	2549.29	20973.7	8.22728	5.13312e-12	2.8217e-10	0	0	9.59379e-09	H+/gluconate symporter and related permeases
cluster1440	1450.82	9902.24	6.82526	4.41422e-10	1.58657e-08	0	0	8.25017e-07	hypothetical protein
cluster266	1193.83	7787.7	6.5233	8.41698e-11	3.5753e-09	0	0	1.57313e-07	tRNA 5-methylaminomethyl-2-thiouridine synthaseTusA
cluster2982	665.373	3604.37	5.41706	1.58088e-08	3.74009e-07	0	0	2.95467e-05	Cell division protein ftsJ / Ribosomal RNA large subunit methyltransferase J (EC 2.1.1.-)
cluster353e	305.392	1639.13	5.36731	5.51215e-10	1.88674e-08	0	0	1.03022e-06	predicted capsid scaffolding protein
cluster157	272.043	1294.05	4.75677	3.31343e-10	1.23856e-08	0	0	6.19281e-07	Major tail sheath protein
cluster656	580.004	2736.31	4.71774	5.85462e-11	2.66885e-09	0	0	1.09423e-07	Phage-related protein
cluster2202	7564.27	34196.9	4.52085	8.53784e-09	2.15638e-07	0	0	1.59572e-05	ATP-dependent hsl protease ATP-binding subunit HslU
cluster252	2255.95	10160.1	4.50367	7.52261e-09	1.95274e-07	0	0	1.40598e-05	Preprotein translocase subunit YajC (TC3.A.5.1.1)
cluster2152a	2930.27	13183.9	4.4992	4.88025e-11	2.2803e-09	0	0	9.12119e-08	Heat shock protein GrpE
cluster2325	7184.47	30106.1	4.19044	7.56654e-08	1.57132e-06	0	0	0.000141419	L-lactate permease
cluster292	973.687	4080.13	4.19039	6.41254e-11	2.85358e-09	0	0	1.1985e-07	hypothetical protein
cluster1134	721.978	2985.19	4.13475	3.54219e-11	1.69753e-09	0	0	6.62035e-08	hypothetical protein
cluster205	4201.53	17178.7	4.08869	8.99544e-10	2.8987e-08	0	0	1.68125e-06	Zn-dependent protease with chaperone function
cluster1410	563.138	2201.04	3.90854	3.54952e-09	1.02062e-07	0	0	6.63406e-06	Ribosomal large subunit pseudouridine synthase D (EC 4.2.1.70)
cluster1324b	125.851	481.058	3.82243	2.43051e-08	5.53978e-07	0	0	4.54262e-05	hypothetical protein
cluster1717	8195.13	30792	3.75735	2.79064e-09	8.41243e-08	0	0	5.21571e-06	Zn-dependent oligopeptidases
cluster3041	5684.9	21328.6	3.7518	1.87651e-10	7.15755e-09	0	0	3.5072e-07	Putative TEGT family carrier/transport protein
cluster918	180.391	668.91	3.70811	4.09828e-09	1.16056e-07	0	0	7.65968e-06	hypothetical protein
cluster1261	2284.93	8453.32	3.69959	3.01239e-08	6.78332e-07	0	0	5.63016e-05	Manganese superoxide dismutase (EC 1.15.1.1) SodA
cluster1692b	153.752	559.904	3.64161	2.139e-07	4.14527e-06	0	0	0.00039978	COG0580: Glycerol uptake facilitator and related permeases
cluster2369	2762.15	10020.2	3.62767	4.86609e-08	1.05753e-06	0	0	9.09473e-05	cAMP-binding proteins - catabolite gene activator and regulatory subunit of cAMP-dependent protein kinases
cluster1617	13372.6	48508.4	3.62745	6.84104e-07	1.1416e-05	0	0.0153438	0.00127859	ATP-dependent protease hslV (EC 3.4.25.-)
cluster2601	1390.58	4929.16	3.54469	4.75209e-09	1.30613e-07	0	0	8.88166e-06	Thioredoxin reductase (EC 1.8.1.9)
cluster2517	336.382	1176.79	3.49838	5.133e-09	1.39037e-07	0	0	9.59358e-06	hypothetical protein
cluster3002	4172.18	14417.1	3.45553	6.89757e-08	1.44849e-06	0	0	0.000128916	Protein-export membrane protein secD (TC3.A.5.1.1)
cluster757	933.352	3199.74	3.42823	1.29679e-08	3.14766e-07	0	0	2.4237e-05	hypothetical protein
cluster1445	877.139	2873.29	3.27575	3.40342e-09	9.93905e-08	0	0	6.36099e-06	Phage terminase endonuclease subunit
cluster1604	314.912	1025.45	3.25632	5.93536e-08	1.26059e-06	0	0	0.000110932	Major capsid protein precursor
cluster11a	748.93	2378.53	3.17591	4.49402e-08	9.88155e-07	0	0	8.39932e-05	hypothetical protein
cluster588	547.164	1709.05	3.12346	9.77589e-08	1.98599e-06	0	0	0.000182711	hypothetical protein
cluster438	311.625	930.756	2.98678	2.00735e-08	4.63179e-07	0	0	3.75175e-05	corresponds to STY4529 from Accession AL513382:Salmonella typhi CT18
cluster2443xx	147.568	431.964	2.92723	9.81429e-06	0.000121538	0	0.0429443	0.0183429	hemoglobin-binding protein
cluster2633	4060.26	11672.1	2.87472	5.42186e-07	9.29676e-06	0	0.0159255	0.00101335	Similar to coproporphyrinogen III oxidaseoxygen-independent (EC 1.3.99.22)
cluster2364	3286.59	9316.92	2.83483	6.73025e-09	1.77167e-07	0	0	1.25788e-05	Hypothetical protein ybgI
cluster2321	2450.23	6778.32	2.7664	2.15137e-07	4.14527e-06	0	0	0.000402091	N-acetylglucosamine-6-phosphate deacetylase (EC3.5.1.25)
cluster2121	115.353	313.482	2.71758	2.80766e-06	3.97539e-05	0	0.0198084	0.00524752	hypothetical protein
cluster2365	527.185	1422.61	2.6985	2.12634e-07	4.14527e-06	0	0	0.000397414	hypothetical protein
cluster2728	16788.6	44598.1	2.65645	1.35516e-08	3.24718e-07	0	0.0114121	2.5328e-05	Cell division protein ftsH (EC 3.4.24.-)
cluster685	2705.76	7119.55	2.63125	1.36006e-06	2.03356e-05	0	0.0327196	0.00254194	COG3103: SH3 domain protein
cluster2058	4612.26	12051.7	2.61297	3.32552e-07	6.21541e-06	0	0.00955628	0.000621541	Protein-export membrane protein secF (TC3.A.5.1.1)
cluster2622	4248.81	10936.7	2.57407	1.68256e-05	0.000195324	0	0.0684568	0.0314471	TRAP-type transport system large permease component. predicted N-acetylneuraminate transporter /TRAP-type transport system small permease component. predicted N-acetylneuraminate transporter
cluster245	5746.56	14778.6	2.57173	5.15577e-08	1.1076e-06	0	0	9.63613e-05	Ferredoxin 2Fe-2S
cluster2108d	2620.82	6688.87	2.5522	1.8438e-07	3.66602e-06	0	0	0.000344606	glycerophosphoryl diester phosphodiesterase precursor
cluster1943	401.559	1024.3	2.55081	1.66512e-05	0.000194507	0	0.0611767	0.0311211	Putative protein-S-isoprenylcysteine methyltransferase
cluster2733	5844.96	14501.4	2.48101	7.99275e-07	1.299e-05	0	0.0342717	0.00149384	Uracil permease
cluster2108e	10053.4	24421.5	2.42919	8.13544e-09	2.0829e-07	0	0	1.52051e-05	glycerophosphoryl diester phosphodiesteraseprecursor
cluster2943	946.792	2250.16	2.37662	1.23386e-07	2.47967e-06	0	0.00820613	0.000230609	NADH pyrophosphatase (EC 3.6.1.22)
cluster595	662.3	1570.84	2.37179	2.23411e-07	4.26077e-06	0	0	0.000417556	Glutaredoxin 1
cluster2463	14304.6	33724.4	2.35758	1.89221e-08	4.42067e-07	0	0.0111355	3.53653e-05	ATP-dependent protease La (EC 3.4.21.53) Type I
cluster259	4094.09	9565	2.3363	3.45383e-07	6.33949e-06	0	0.00930763	0.00064552	O-succinylbenzoate-CoA synthase (EC 4.2.1.-)
cluster1067	2609.01	5972.43	2.28916	1.08655e-06	1.70652e-05	0	0.0303614	0.00203076	hypothetical protein
cluster1095b	845.032	1895.96	2.24366	5.32791e-07	9.22024e-06	0	0.0228943	0.000995786	putative DNA binding protein
cluster2890	2049.49	4569.36	2.22952	1.08116e-05	0.000131213	0	0.045761	0.0202068	GTP-binding protein EngA
cluster281	177.211	389.721	2.19919	9.07418e-06	0.00011455	0	0.035608	0.0169596	hypothetical protein
cluster1401	3412.8	7417.68	2.17349	9.13212e-06	0.00011455	0	0.0851255	0.0170679	Phosphate transport regulator (distant homolog of PhoU)
cluster1286d	989.938	2137.4	2.15912	3.91391e-06	5.41859e-05	0	0.0575185	0.00731509	Single-stranded DNA-binding protein
cluster1868	5889.41	12687.5	2.15429	2.93845e-06	4.1293e-05	0	0.0597924	0.00549197	phosphate permease
cluster787	163.786	349.61	2.13455	2.17675e-05	0.000240731	0	0.0473587	0.0406835	hypothetical protein
cluster23	324.619	691.713	2.13084	6.30785e-06	8.1306e-05	0	0.0361251	0.0117894	P2-like prophage tail protein X
cluster538	9324.83	19641.3	2.10635	2.41488e-07	4.559e-06	0	0.0386111	0.000451341	Iron-sulfur cluster assembly scaffold protein IscU
cluster1903	9480.17	19772.3	2.08565	3.82393e-07	6.87204e-06	0	0.0454702	0.000714693	Cysteine desulfurase (EC 2.8.1.7)
cluster1707	3316.53	6839.32	2.06219	3.45839e-06	4.82368e-05	0	0.069458	0.00646372	Chaperone protein HscB
cluster2770	8292.6	17007.8	2.05096	4.37222e-07	7.63708e-06	0	0.0290144	0.000817168	Glucosamine-6-phosphate deaminase (EC3.5.99.6)
cluster1390	4704.86	9504.67	2.02018	4.97366e-06	6.78524e-05	0	0.0436536	0.00929578	Iron binding protein IscA for iron-sulfur cluster assembly
cluster2273	8763.76	17654.6	2.0145	7.27346e-07	1.20302e-05	0	0.0527939	0.00135941	hypothetical protein
cluster471	6051.5	2997.93	-2.01856	1.93446e-06	2.84686e-05	0	0.0564542	0.00361551	Pyrroline-5-carboxylate reductase (EC 1.5.1.2)
cluster557	1003.04	496.701	-2.0194	6.16473e-06	8.0013e-05	0	0.0256469	0.0115219	hypothetical protein
cluster2275	5872.37	2903.15	-2.02276	2.05141e-05	0.000231818	0	0.0896084	0.0383409	Disulfide bond chaperones of the HSP33 family
cluster1721	7367.18	3554.86	-2.07243	2.33913e-05	0.000255663	0	0.093702	0.0437184	homoserine kinase( EC:2.7.1.39 )
cluster2668	4124.29	1978.57	-2.08448	1.22032e-06	1.87135e-05	0	0.0193036	0.00228077	TPR-repeat-containing protein
cluster1162	25682	12291.5	-2.0894	1.23273e-06	1.87135e-05	0	0.050413	0.00230397	Aerobic respiration control protein arcA
cluster1005	5979.93	2818.5	-2.12167	2.37319e-05	0.000257878	0	0.0923987	0.044355	Thiaminase II (EC 3.5.99.2)
cluster1207b	6539.09	3080.77	-2.12255	2.29252e-06	3.29593e-05	0	0.0495021	0.00428471	prophage CP4-57-like integrase
cluster2769b	549.822	256.693	-2.14194	9.81929e-06	0.000121538	0	0.0352068	0.0183523	hypothetical protein
cluster2320	9165.11	4265.97	-2.14842	1.24156e-06	1.87135e-05	0	0.0452265	0.00232047	Twin-arginine translocation protein TatB
cluster2817a	557.418	257.421	-2.16539	2.06002e-05	0.000231818	0	0.0560256	0.0385017	ComE, competence protein E
cluster2155	1397.53	642.747	-2.1743	5.69894e-06	7.50092e-05	0	0.0416422	0.0106513	Dihydrofolate reductase (EC 1.5.1.3)
cluster2176	9344.6	4284.26	-2.18115	9.99909e-07	1.58375e-05	0	0.0427397	0.00186883	ABC-type polar amino acid transport system ATPase component
cluster1727	5137.15	2316.34	-2.21778	2.10473e-06	3.04941e-05	0	0.015823	0.00393374	ABC-type amino acid transport system permease component
cluster2168	1214.34	541.454	-2.24273	1.05233e-05	0.00012855	0	0.0489884	0.0196681	Twin-arginine translocation protein TatC
cluster1074	427.425	189.665	-2.25358	1.97381e-05	0.000226322	0	0.0300455	0.0368905	orf21
cluster2569	918.998	397.809	-2.31015	3.9419e-07	7.01658e-06	0	0.00543532	0.000736741	predicted permease
cluster345	3009.8	1268.43	-2.37285	8.92781e-07	1.43846e-05	0	0.0138294	0.00166861	Guanylate kinase (EC 2.7.4.8)
cluster1399	5083.15	2117.25	-2.40082	1.84425e-05	0.000212771	0	0.0601265	0.034469	Aspartokinase (EC 2.7.2.4) / Homoserinedehydrogenase (EC 1.1.1.3)
cluster3019	49752.5	20427.5	-2.43557	1.38393e-10	5.50332e-09	0	0	2.58656e-07	C4-dicarboxylate like transporter
cluster2996	12646.4	5108.37	-2.47562	5.07481e-06	6.87306e-05	0	0.0529433	0.00948483	Manganese ABC transporter inner membrane permease protein SitD
cluster2335	2397.17	958.793	-2.5002	1.10724e-06	1.72452e-05	0	0.0138433	0.00206943	4'-phosphopantetheinyl transferase (EC2.7.8.-)
cluster31	437.918	171.54	-2.55287	1.35497e-05	0.000161302	0	0.0330242	0.0253244	ComD, competence protein D
cluster2561	1961.23	757.619	-2.58867	2.22075e-05	0.000244152	0	0.0527612	0.0415058	ATP phosphoribosyltransferase (EC 2.4.2.17)
cluster735	6383.37	2438.49	-2.61776	3.67856e-08	8.1848e-07	0	0	6.87523e-05	Cytochrome c heme lyase subunit CcmL
cluster2190	25934.8	9900.47	-2.61956	6.08847e-09	1.62562e-07	0	0	1.13794e-05	Alpha-aspartyl dipeptidase Peptidase E (EC3.4.13.21)
cluster3059	41761.4	15459.1	-2.70141	3.44998e-11	1.69753e-09	0	0	6.44802e-08	TorZ, Trimethylamine-N-oxide reductase (TMAO) (EC 1.6.6.9)
cluster2013	36418.8	13478.2	-2.70205	3.43205e-10	1.25775e-08	0	0	6.41451e-07	formate acetyltransferase
cluster2546	30763.4	11078.4	-2.77687	9.29181e-10	2.94346e-08	0	0	1.73664e-06	hypothetical protein
cluster294	28963.9	10380.9	-2.79013	5.55221e-10	1.88674e-08	0	0	1.03771e-06	Periplasmic thiol:disulfide oxidoreductase DsbB required for DsbA reoxidation
cluster419	22511.1	8060.66	-2.79272	1.00481e-08	2.504e-07	0	0	1.878e-05	Cytochrome c-type biogenesis protein CcmE heme chaperone
cluster1025	2451.48	862.841	-2.84117	2.04627e-06	2.98787e-05	0	0.0246315	0.00382447	Cytochrome c-type biogenesis protein CcmG/DsbE thiol:disulfide oxidoreductase
cluster47	7094.97	2493.16	-2.84578	4.69887e-09	1.30613e-07	0	0	8.78218e-06	Molybdenum cofactor biosynthesis protein C, MoaC
cluster2910c	30263.5	10456.9	-2.89412	1.3001e-10	5.28237e-09	0	0	2.42989e-07	ROK family Glucokinase with ambiguous substrate specificity
cluster2387b	430.781	145.831	-2.95397	6.4591e-06	8.26854e-05	0	0.0210542	0.0120721	hypothetical protein
cluster2299	1083.16	341.678	-3.17013	6.35767e-07	1.07295e-05	0	0.012672	0.00118825	ComF, Competence protein F
cluster1087	823.915	258.131	-3.19184	1.12314e-08	2.76204e-07	0	0	2.09915e-05	Arylsulfatase regulator (Fe-S oxidoreductase)
cluster2005	2631.35	815.441	-3.22691	2.97058e-09	8.81273e-08	0	0	5.55202e-06	Ribonuclease T (EC 3.1.13.-)
cluster54	9749.42	2900.49	-3.3613	8.34028e-10	2.78357e-08	0	0	1.5588e-06	6-phosphofructokinase (EC 2.7.1.11)
cluster1241	9123.36	2686.14	-3.39645	1.82263e-10	7.09688e-09	0	0	3.4065e-07	Cytochrome c heme lyase subunit CcmF
cluster1088	28013.2	8185.09	-3.42246	3.46395e-11	1.69753e-09	0	0	6.47413e-08	Formate efflux transporter (TC 2.A.44 family)
cluster320	4404.13	1281.56	-3.43654	9.60451e-10	2.9918e-08	0	0	1.79508e-06	Molybdenum cofactor biosynthesis protein D; Molybdopterin converting factor subunit 1, MoaD
cluster2855	14556.4	3897.72	-3.7346	6.59539e-12	3.52194e-10	0	0	1.23268e-08	Na+/H+ antiporter
cluster1442	30338.3	7781.77	-3.89863	2.2673e-12	1.36696e-10	0	0	4.23758e-09	Phosphoglycerate mutase (EC 5.4.2.1)
cluster2947b	37123.4	9336.37	-3.97621	1.02252e-13	8.6609e-12	0	0	1.91108e-10	TorY, Cytochrome c-type protein
cluster411	5907.21	1393.13	-4.24024	6.9843e-11	3.03573e-09	0	0	1.30537e-07	Cytidine deaminase (EC 3.5.4.5)
cluster2226	3731.65	875.668	-4.26149	1.38267e-09	4.23641e-08	0	0	2.58421e-06	ABC transporter ATP-binding protein
cluster544	7343.08	1624.36	-4.52059	1.0594e-10	4.40004e-09	0	0	1.98002e-07	Cytochrome c-type biogenesis protein CcmC putative heme lyase for CcmE
cluster2328	42169.1	9033.15	-4.66826	1.52101e-14	1.57931e-12	0	0	2.84276e-11	Cytochrome c552 precursor (EC 1.7.2.2) NrfA
cluster2103	6210.14	1306.46	-4.75342	8.79274e-10	2.88309e-08	0	0	1.64336e-06	Nitric oxide-dependent regulator DnrN or NorA
cluster230	10898.8	2219.61	-4.91023	5.08539e-10	1.79332e-08	0	0	9.50459e-07	Cytochrome c-type biogenesis protein CcmD interacts with CcmCE
cluster6	8346.69	1663.71	-5.01691	3.65197e-12	2.06834e-10	0	0	6.82553e-09	ABC transporter involved in cytochrome c biogenesis CcmB
cluster2975h	8721.36	1726.14	-5.05252	1.45632e-11	7.56075e-10	0	0	2.72187e-08	hypothetical protein
cluster2311c	2297.93	443.633	-5.17979	3.72073e-07	6.75151e-06	0	0	0.000695405	Integral membrane protein possibly involved in chromosome condensation
cluster581	11176.7	2113.21	-5.28898	1.36025e-12	8.76655e-11	0	0	2.5423e-09	ABC transporter involved in cytochrome c biogenesis ATPase component CcmA
cluster3052	24755.9	4546.01	-5.44563	2.33924e-13	1.68155e-11	0	0	4.37204e-10	Hydrolase (HAD superfamily)
cluster1427	23875.9	4006.36	-5.9595	7.0588e-13	4.71175e-11	0	0	1.31929e-09	NrfD formate-dependent nitrite reductase membrane component
cluster2910b	11183.5	1771.36	-6.31352	1.77802e-12	1.10771e-10	0	0	3.32312e-09	ROK family Glucokinase with ambiguous substrate specificity
cluster599	3328.98	517.661	-6.43081	9.26125e-07	1.47942e-05	0	0.00252117	0.00173093	Molybdenum cofactor biosynthesis protein A, MoaA
cluster1869	20333.8	2947.17	-6.89945	4.37428e-14	3.89311e-12	0	0	8.17553e-11	Phosphoenolpyruvate carboxylase (EC 4.1.1.31)
cluster947	22732.2	3112.39	-7.30377	3.40061e-13	2.35398e-11	0	0	6.35575e-10	NrfC protein
cluster2142	21049.7	2727.66	-7.71711	2.81997e-14	2.77396e-12	0	0	5.27052e-11	Cytochrome c-type protein NrfB
cluster1151	9088.44	1160.87	-7.82898	3.93019e-14	3.67276e-12	0	0	7.34552e-11	Triosephosphate isomerase (EC 5.3.1.1)
cluster2113	34130.1	4302.28	-7.93304	<1E-16	<1E-16	0	0.000677188	<1E-16	DmsA, anaerobic dimethyl sulfoxide reductase chain A
cluster507	20387.7	2144.17	-9.50844	4.44089e-15	5.92859e-13	0	0.000670793	8.30003e-12	putative membrane protein
cluster2028	39429.6	3932.24	-10.0272	<1E-16	<1E-16	0	0.000472101	<1E-16	DmsB, Anaerobic dimethyl sulfoxide reductase chain B(EC 1.8.99.-)
cluster2560	8049.99	650.928	-12.3669	6.66134e-16	1.55626e-13	0	0.00048052	1.245e-12	Dethiobiotin synthetase (EC 6.3.3.3)
cluster9	5634.43	452.797	-12.4436	1.11022e-15	2.07501e-13	0	0.000202384	2.07501e-12	Ferredoxin-type protein NapF (periplasmic nitrate reductase)
cluster231a	35163.4	2771.49	-12.6875	<1E-16	<1E-16	0	0.000138723	<1E-16	DmsC, Anaerobic dimethyl sulfoxide reductase chain C(EC 1.8.99.-)
cluster2197	15369.6	1138.98	-13.4942	1.11022e-16	3.45834e-14	0	0.000507296	2.07501e-13	lrgA-associated membrane protein LrgB
cluster323	9753.98	695.831	-14.0177	6.66134e-16	1.55626e-13	0	0.000543939	1.245e-12	Putative inner membrane protein
cluster2554	3054.16	159.779	-19.1149	2.71616e-12	1.58641e-10	0	0	5.0765e-09	Antiholin-like protein LrgA
cluster3031	23038.9	1161.17	-19.8411	<1E-16	<1E-16	0	0	<1E-16	Putative oxidoreductase component of anaerobicde hydrogenases; Chaperone protein TorD
cluster2051k	1246.86	48.9474	-25.4736	1.11022e-15	2.07501e-13	0	0	2.07501e-12	SlrVA protein (macrophage survival factor, msfA), Sel1-like repeat
cluster2470b	13280.6	318.439	-41.7054	<1E-16	<1E-16	0	0	<1E-16	Tripeptide aminopeptidase (EC 3.4.11.4)
