# Supplementary material for: Identification and Characterization of msf, a Novel Virulence Factor in Haemophilus influenzae
Source: PLoS One. 2016 Mar 15;11(3):e0149891. doi: 10.1371/journal.pone.0149891 (PMC4792463; doi:10.1371/journal.pone.0149891)
Supplement: S7 Table — (XLSX) [file pone.0149891.s010.xlsx]

## Sheet: Sheet1
SGH Array cluster ID	Gene	Annotation	5' Primer Sequence	3' Primer Sequence
cluster2470b	-	Tripeptide aminopeptidase (EC 3.4.11.4)	TGATTGGGCATATACCATTGAT	TTTGCCGTTGCAGCATTA
cluster9	napF	Ferredoxin-type protein (periplasmic nitrate reductase)	CCGACAAATGCACTACATCC	TGAGGAAAATTGTGGACGAA
cluster2197	lrgB	lrgA-associated membrane protein	GCAAACGTTGGAAGTCAATG	TCATAAGGAATCTTGCCTATCACTAA
cluster2142	nrfB	Cytochrome c-type protein precursor	CCGTTCAAGAACAAAACCAAG	TGAGCCCATAATTTTTCACGA
cluster599	moaA	Molybdenum cofactor biosynthesis protein A	CGAAGAAGGCATTGAATTACG	AGTGCGGCAAAAATACGC
cluster581	ccmA	ABC transporter involved in cytochrome c biogenesis ATPase component	TGCTCAACGAGGTGGTATTG	GCAGATGAGAACTTGGCACTT
cluster2328	nrfA	Cytochrome c552 precursor (EC 1.7.2.2)	GGACGCAGGTGCAACTAAA	TTGAGCATGACGAATATCCATT
cluster1261	sodA	Manganese superoxide dismutase (EC 1.15.1.1)	TCAGGATGGGCATGGTTAGT	TGCTGTTGATACAACGGCTAA
cluster478	-	Candidate type III effector Hop protein	AAGAACGTTTTGCGGAACTC	TTATCCACGGCATCAACAAC
cluster2202	hslU	ATP-dependent hsl protease ATP-binding subunit	CGTGTCTATGGGGGTTGAAA	TTGGAACAATGATTGCAGTTG
cluster2051k	msfA1	macrophage survival factor A1, type slrVA	TTTCAATCCACCGCTTGG	GGCTTCAGAACCTTGTTGGA
cluster2051k	msfA2	macrophage survival factor A2, type slrVA	TTTCAATCCACCGCTTGG	AGCGGTTAAACCTTGTTGGA
cluster2051k	msfA3	macrophage survival factor A3, type slrVA	CTTTTCAATCCACCGCTTG	ATAAGCGGTTGAACCTTGTTG
cluster2051k	msfA4	macrophage survival factor A4, type slrVA	TATCGAAGCCGTGAAGTGG	AAACTGACCATCAGCACTACCA
cluster2756	gapA	glyceraldehyde 3-phosphate dehydrogenase	TGGAATGATGTTTTGTGATGC	CACGCAACGACTGCAACT
