# Supplementary material for: Identification and Characterization of msf, a Novel Virulence Factor in Haemophilus influenzae
Source: PLoS One. 2016 Mar 15;11(3):e0149891. doi: 10.1371/journal.pone.0149891 (PMC4792463; doi:10.1371/journal.pone.0149891)
Supplement: S8 Table — (XLSX) [file pone.0149891.s011.xlsx]

## Sheet: Sheet1
Mutant	OLIGO NUMBER	SEQUENCE
Pitt II Msf-KO	1	ATGGCGACAATTATCAAGAATGGCAAGCGTTGGCGC
Pitt II Msf-KO	2	ATATGCGGCCGCAAATACAGAAGCACCGAAAAGTGC
Pitt II Msf-KO	3	ATATGAGCTCTGCAAAGGCTCAATTTAATTTGGGCG
Pitt II Msf-KO	4	CGATGCTAATGCCAACGCAATA
86-028NP Msf-KO	5	ATTTTCTTACGAATCTCACCGTATTTATTCGGTTCGCATTCTT
86-028NP Msf-KO	6	ATATGCGGCCGCCATAGAAATCGTCCATTTATTAAT
86-028NP Msf-KO	7	ATATGTCGACTAAATAGAGGGGAACGCTAATGCCAA
86-028NP Msf-KO	8	TTCCGCTTTGGATTCTTCGATT
Pitt II Msf-KO	9	ATATGCGGCCGCCTATGAAGCGCCATATTTAAAAAGACTACCAAG
Pitt II Msf-KO	10	CCATGAGCTCAAGCTTTTTAGACATCTAAATC
Pitt II Msf-COMP / Rd Msf-INS	11	ATATGGATCCATGCGATTCACAAAAACACTTTTTACCACCGCACTTTTCGGTG
Pitt II Msf-COMP / Rd Msf-INS	12	ATATGTCGACTTACAGATCCTCCTCACTTATCAGCTTCTGCTCGAGCTCCCCTCTATTTAACTTG
